# Supplementary material
Source: MDPI journal article supplement (https://www.mdpi.com/2673-6284/12/1/6)
Supplement: s1 [file s1]

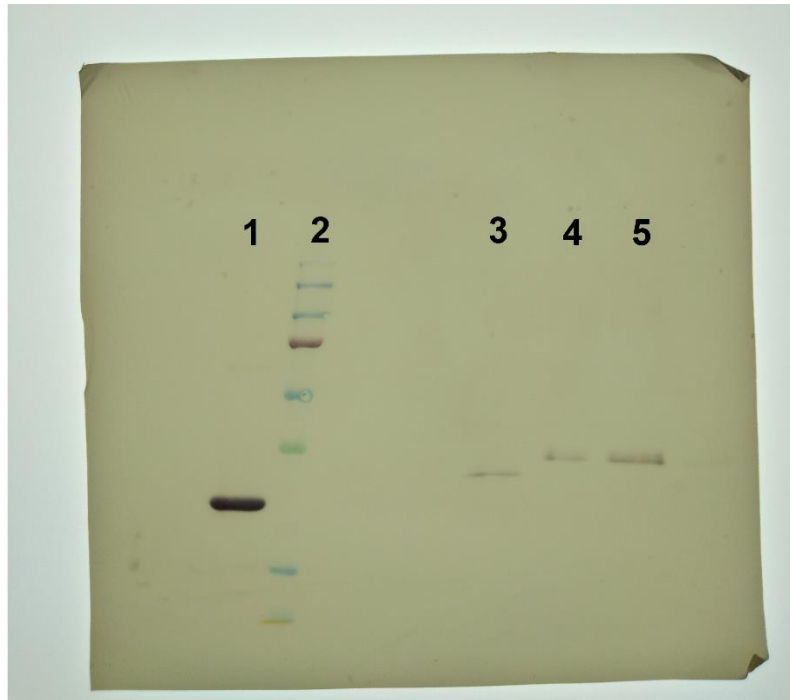

**Figure S1.** Western blotting anti-HisTag: Purified *Pyrococcus furiosus* recombinant lipase was used as a positive control (line 1); molecular weight marker (line 2); supernatant containing the recombinant lipase before (lines 4 and 5) and after (line 3) treatment with EndoH. This original image corresponds to the Figure 3c in the manuscript.
